# Supplementary material
Source: ML conference proceedings conference paper supplement (https://proceedings.neurips.cc/paper_files/paper/2020/hash/0b96d81f0494fde5428c7aea243c9157-Abstract.html)
Supplement: Supplementary file [file 0b96d81f0494fde5428c7aea243c9157-Supplemental.pdf]

---

# Supplementary Material: Discovering Reinforcement Learning Algorithms

---

Junhyuk Oh   Matteo Hessel   Wojciech M. Czarnecki   Zhongwen Xu  
Hado van Hasselt   Satinder Singh   David Silver

DeepMind

## A Training Environments

### A.1 Tabular Grid World

When an agent collects an object, it receives the corresponding reward  $r$ , and the episode terminates with a probability of  $\epsilon_{\text{term}}$  associated with the object. The object disappears when collected, and reappears with a probability of  $\epsilon_{\text{respawn}}$  for each time-step. In the following sections, we describe each object type  $i$  as  $\{N \times [r, \epsilon_{\text{term}}, \epsilon_{\text{respawn}}]\}_i$ , where  $N$  is the number of objects with type  $i$ .

**Observation Space** In tabular grid worlds, object locations are randomised across lifetimes but fixed within a lifetime. Thus, there are only  $p \times 2^m$  possible states in each lifetime, where  $p$  is the number of possible positions, and  $m$  is the total number of objects. An agent is simply represented by a table with distinct  $\pi(a|s)$  and  $y(s)$  values for each state without any function approximation.

**Action Space** There are two different action spaces. One version consists of 9 movement actions for adjacent positions (including staying at the same position) and 9 actions for collecting objects at adjacent positions. The other version has only 9 movement actions. In this version, an object is automatically collected when the agent visits it. We randomly sample either one of the action spaces for each lifetime during meta-training.

#### A.1.1 Dense

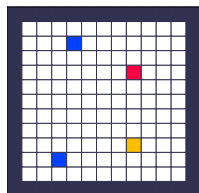

| Component                 | Description                                           |
|---------------------------|-------------------------------------------------------|
| Observation               | State index (integer)                                 |
| Number of actions         | 9 or 18                                               |
| Size                      | $11 \times 11$                                        |
| Objects                   | $2 \times [1, 0, 0.05], [-1, 0.5, 0.1], [-1, 0, 0.5]$ |
| Maximum steps per episode | 500                                                   |

### A.1.2 Sparse

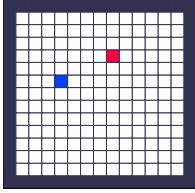

| Component                 | Description                |
|---------------------------|----------------------------|
| Observation               | State index (integer)      |
| Number of actions         | 9 or 18                    |
| Size                      | $13 \times 13$             |
| Objects                   | $[1, 1, 0]$ , $[-1, 1, 0]$ |
| Maximum steps per episode | 50                         |

### A.1.3 Long Horizon

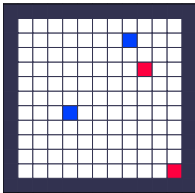

| Component                 | Description                                       |
|---------------------------|---------------------------------------------------|
| Observation               | State index (integer)                             |
| Number of actions         | 9 or 18                                           |
| Size                      | $11 \times 11$                                    |
| Objects                   | $2 \times [1, 0, 0.01]$ , $2 \times [-1, 0.5, 1]$ |
| Maximum steps per episode | 1000                                              |

### A.1.4 Longer Horizon

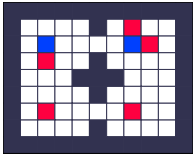

| Component                 | Description                                         |
|---------------------------|-----------------------------------------------------|
| Observation               | State index (integer)                               |
| Number of actions         | 9 or 18                                             |
| Size                      | $7 \times 9$                                        |
| Objects                   | $2 \times [1, 0.1, 0.01]$ , $5 \times [-1, 0.8, 1]$ |
| Maximum steps per episode | 2000                                                |

### A.1.5 Long Dense

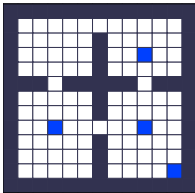

| Component                 | Description              |
|---------------------------|--------------------------|
| Observation               | State index (integer)    |
| Number of actions         | 9 or 18                  |
| Size                      | $11 \times 11$           |
| Objects                   | $4 \times [1, 0, 0.005]$ |
| Maximum steps per episode | 2000                     |

## A.2 Random Grid World

The random grid worlds are almost the same as the tabular grid worlds except that object locations are randomised within a lifetime. More specifically, object locations are randomly determined at the beginning of each episode, and objects re-appear at random locations after being collected. Due to the randomness, the state space is exponentially large, which requires function approximation to represent an agent. The observation consists of a tensor  $\{0, 1\}^{N \times H \times W}$ , where  $N$  is the number of object types,  $H \times W$  is the size of the grid.

### A.2.1 Dense

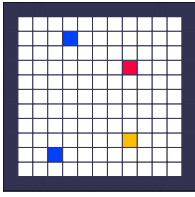

| Component                 | Description                                           |
|---------------------------|-------------------------------------------------------|
| Observation               | $\{0, 1\}^{N \times H \times W}$                      |
| Number of actions         | 9 or 18                                               |
| Size                      | $11 \times 11$                                        |
| Objects                   | $2 \times [1, 0, 0.05], [-1, 0.5, 0.1], [-1, 0, 0.5]$ |
| Maximum steps per episode | 500                                                   |

### A.2.2 Long Horizon

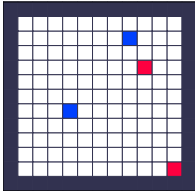

| Component                 | Description                                    |
|---------------------------|------------------------------------------------|
| Observation               | $\{0, 1\}^{N \times H \times W}$               |
| Number of actions         | 9 or 18                                        |
| Size                      | $11 \times 11$                                 |
| Objects                   | $2 \times [1, 0, 0.01], 2 \times [-1, 0.5, 1]$ |
| Maximum steps per episode | 1000                                           |

### A.2.3 Small

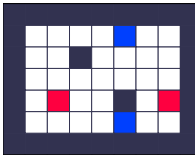

| Component                 | Description                                      |
|---------------------------|--------------------------------------------------|
| Observation               | $\{0, 1\}^{N \times H \times W}$                 |
| Number of actions         | 9 or 18                                          |
| Size                      | $5 \times 7$                                     |
| Objects                   | $2 \times [1, 0, 0.05], 2 \times [-1, 0.5, 0.1]$ |
| Maximum steps per episode | 500                                              |

### A.2.4 Small Sparse

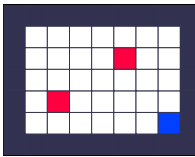

| Component                 | Description                      |
|---------------------------|----------------------------------|
| Observation               | $\{0, 1\}^{N \times H \times W}$ |
| Number of actions         | 9 or 18                          |
| Size                      | $5 \times 7$                     |
| Objects                   | $[1, 1, 1], 2 \times [-1, 1, 1]$ |
| Maximum steps per episode | 50                               |

### A.2.5 Very Dense

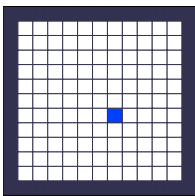

| Component                 | Description                      |
|---------------------------|----------------------------------|
| Observation               | $\{0, 1\}^{N \times H \times W}$ |
| Number of actions         | 9 or 18                          |
| Size                      | $11 \times 11$                   |
| Objects                   | $[1, 0, 1]$                      |
| Maximum steps per episode | 2000                             |

## A.3 Delayed Chain MDP

This environment is inspired by the *Umbrella* environment in Behaviour Suite [7]. The agent has a binary choice ( $a_0, a_1$ ) for each time-step. The first action determines the reward at the end of the

episode (1 or -1). The episode terminates after a fixed number of steps (i.e., chain length), which is sampled randomly from a pre-defined range for each lifetime and fixed within a lifetime. For each episode, we randomly determine which action leads to a positive reward and sample the corresponding chain MDP. There is no state aliasing because all states are distinct. Optionally, there can be noisy rewards  $\{1, -1\}$  for the states in the middle that are independent of the agent's action.

### A.3.1 Short

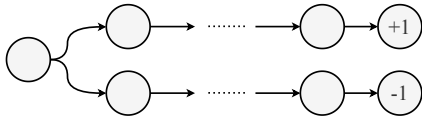

| Component         | Description           |
|-------------------|-----------------------|
| Observation       | State index (integer) |
| Number of actions | 2                     |
| Chain length      | [5, 30]               |
| Noisy rewards     | No                    |

### A.3.2 Short and Noisy

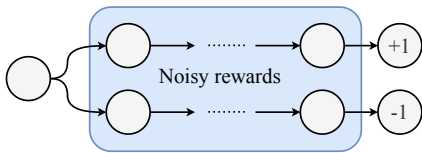

| Component         | Description           |
|-------------------|-----------------------|
| Observation       | State index (integer) |
| Number of actions | 2                     |
| Chain length      | [5, 30]               |
| Noisy rewards     | Yes                   |

### A.3.3 Long

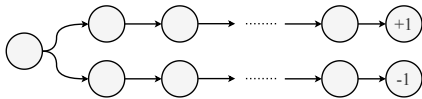

| Component         | Description           |
|-------------------|-----------------------|
| Observation       | State index (integer) |
| Number of actions | 2                     |
| Chain length      | [5, 50]               |
| Noisy rewards     | No                    |

### A.3.4 Long and Noisy

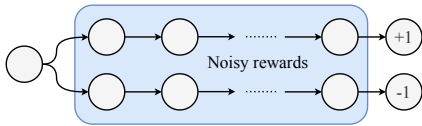

| Component         | Description           |
|-------------------|-----------------------|
| Observation       | State index (integer) |
| Number of actions | 2                     |
| Chain length      | [5, 50]               |
| Noisy rewards     | Yes                   |

### A.3.5 State Distraction

In this delayed chain MDP, an observation  $s_t \in \{0, 1\}^{22}$  consists of two relevant bits: whether  $a_0$  is the correct action and whether the agent has chosen the correct action, and noisy bits  $\{0, 1\}^{20}$  that are randomly sampled independently for all states. The agent is required to find out the relevant bits while ignoring the noisy bits in the observation.

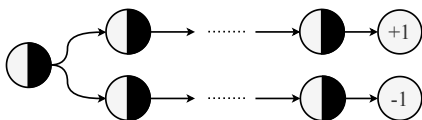

| Component         | Description     |
|-------------------|-----------------|
| Observation       | $\{0, 1\}^{22}$ |
| Number of actions | 2               |
| Chain length      | [5, 30]         |
| Noisy rewards     | No              |

## B Implementation Details

### B.1 Meta-Training

We trained LPGs by simulating 960 parallel lifetimes (i.e., batch size for meta-gradients), each of which has a learning agent interacting with a sampled environment, for approximately  $10^{10}$  steps of interactions in total. In each lifetime, the agent updates its parameters using a batch of trajectories generated from 64 parallel environments (i.e., batch size for agent). Each trajectory consists of 20 steps. Thus, each parameter update consists of  $64 \times 20$  steps. The meta-hyperparameters used for meta-training is summarised in Table 1.

**Details of LPG Architecture** The LPG network takes  $x_t = [r_t, d_t, \gamma, \pi(a_t|s_t), y_\theta(s_t), y_\theta(s_{t+1})]$  at each time-step  $t$ , where  $r_t$  is a reward,  $d_t$  is a binary value indicating episode-termination, and  $\gamma$  is a discount factor.  $y_\theta(s_t)$  and  $y_\theta(s_{t+1})$  are mapped to a scalar using a shared embedding network ( $\varphi$ ): Dense(16)-Dense(1). A backward LSTM with 256 units takes  $[r_t, d_t, \gamma, \pi(a_t|s_t), \varphi(y_\theta(s_t)), \varphi(y_\theta(s_{t+1}))]$  as input and produces  $\hat{\pi}$  and  $\hat{y}$  as output. We slightly modified the LSTM core such that the hidden states are reset for terminal states ( $d_t = 0$ ), which blocks information from flowing across episodes. In our preliminary experiment, this improved generalisation performance by making it difficult for LPG to exploit environment-specific patterns. Rectified linear unit (ReLU) was used as activation function throughout the experiment.

**Details of LPG Update** In Section 3.3, the meta-gradient for updating LPG is described as the outcome of REINFORCE for simplicity. In practice, however, we used advantage actor-critic (A2C) [6] to calculate the meta-gradient, which requires learning value functions for bootstrapping. Note that value functions were trained only to reduce the variance of meta-gradient. LPG itself has no access to value functions during meta-training and meta-testing. In principle, the *outer* algorithm used for discovery can be any RL algorithm, as long as they are designed to maximise cumulative rewards.

**Details of Hyperparameter Balancing** As described in Section 3.4, we trained a bandit  $p(\alpha|\mathcal{E})$  to automatically sample better agent hyperparameters for each environment to make meta-training more stable. More specifically, the bandit samples hyperparameters at the beginning of each lifetime according to:

$$p(\alpha|\mathcal{E}) \propto \exp\left(\frac{R(\alpha, \mathcal{E}) + \rho/\sqrt{N(\alpha, \mathcal{E})}}{\tau}\right), \quad (1)$$

where  $R(\alpha, \mathcal{E})$  is the final return at the end of the agent’s lifetime with hyperparameters  $\alpha$  in environment  $\mathcal{E}$ , which is averaged over the last 10 lifetimes.  $N(\alpha, \mathcal{E})$  is the number of lifetimes simulated.  $\tau$  is a constant temperature, and  $\rho$  is a coefficient for exploration bonus. Intuitively, we keep track of how well each  $\alpha$  performs and sample hyperparameters that tend to produce a larger final return with exploration bonus. In our experiments,  $\alpha$  consists of two hyperparameters: learning rate ( $\alpha_{lr}$ ) and KL cost ( $\alpha_y$ ) for updating the agent’s predictions. Table 2 shows the range of hyperparameters searched by the bandit. Note that this hyperparameter balancing requires multiple lifetimes of experience, which can be done only during meta-training. During meta-testing on unseen environments,  $\alpha$  needs to be manually selected.

**Preventing Early Divergence** We found that meta-training can be unstable especially early in training, because the randomly initialised update rule ( $\eta$ ) tends to make agents diverge or deterministic, which eventually causes exploding meta-gradients. To address this issue, we reset the lifetime whenever the entropy of the policy becomes 0, which means the policy becomes deterministic. We observed that this is triggered a few times early in training but eventually is not triggered later in training as the update rule improves.

Table 1: Meta-hyperparameters for meta-training.

| Hyperparameter                                         | Value         | Searched values           |
|--------------------------------------------------------|---------------|---------------------------|
| Optimiser                                              | Adam          | -                         |
| Learning rate                                          | 0.0001        | {0.0005, 0.0001, 0.00003} |
| Discount factor ( $\gamma$ )                           | {0.995, 0.99} | -                         |
| Policy entropy cost ( $\beta_0$ )                      | {0.01, 0.02}  | -                         |
| Prediction entropy cost ( $\beta_1$ )                  | 0.001         | {0.001, 0.0001}           |
| L2 regularisation weight for $\hat{\pi}$ ( $\beta_2$ ) | 0.001         | {0.01, 0.001}             |
| L2 regularisation weight for $\hat{y}$ ( $\beta_3$ )   | 0.001         | {0.01, 0.001}             |
| Bandit temperature ( $\tau$ )                          | 0.1           | {1, 0.1}                  |
| Bandit exploration bonus ( $\rho$ )                    | 0.2           | {1, 0.2}                  |
| Number of steps for each trajectory                    | 20            | -                         |
| Number of parameter updates ( $K$ )                    | 5             | -                         |
| Number of parallel lifetimes                           | 960           | -                         |
| Number of parallel environments per lifetime           | 64            | -                         |

Discount factor and policy entropy cost are randomly sampled from the specified range for each lifetime.

Table 2: Agent hyperparameters for each training environment.

| Environment    | Architecture       | Optimiser | Learning rate ( $\alpha_{lr}$ ) | KL cost ( $\alpha_y$ ) | Lifetime |
|----------------|--------------------|-----------|---------------------------------|------------------------|----------|
| dense          | Tabular            | SGD       | {20, 40, 80}                    | {0.1, 0.5, 1}          | 3M       |
| sparse         | Tabular            | SGD       | {20, 40, 80}                    | {0.1, 0.5, 1}          | 3M       |
| long_horizon   | Tabular            | SGD       | {20, 40, 80}                    | {0.1, 0.5, 1}          | 3M       |
| longer_horizon | Tabular            | SGD       | {20, 40, 80}                    | {0.1, 0.5, 1}          | 3M       |
| long_dense     | Tabular            | SGD       | {20, 40, 80}                    | {0.1, 0.5, 1}          | 3M       |
| dense          | C(16)-D(32)        | Adam      | {0.0005, 0.001, 0.002, 0.005}   | {0.1, 0.5, 1}          | 30M      |
| long_horizon   | C(16)-D(32)        | Adam      | {0.0005, 0.001, 0.002, 0.005}   | {0.1, 0.5, 1}          | 30M      |
| small          | D(32)              | Adam      | {0.0005, 0.001, 0.002, 0.005}   | {0.1, 0.5, 1}          | 30M      |
| sparse         | D(32)              | Adam      | {0.0005, 0.001, 0.002, 0.005}   | {0.1, 0.5, 1}          | 30M      |
| very_dense     | C(32-16-16)-D(256) | Adam      | {0.0005, 0.001, 0.002, 0.005}   | {0.1, 0.5, 1}          | 30M      |
| short          | Tabular            | SGD       | {20, 40, 80}                    | {0.1, 0.5, 1}          | 1M       |
| short_noisy    | Tabular            | SGD       | {20, 40, 80}                    | {0.1, 0.5, 1}          | 1M       |
| long           | Tabular            | SGD       | {20, 40, 80}                    | {0.1, 0.5, 1}          | 1M       |
| long_noisy     | Tabular            | SGD       | {20, 40, 80}                    | {0.1, 0.5, 1}          | 1M       |
| distractor     | D(16)              | Adam      | {0.002, 0.005, 0.01}            | {0.1, 0.5, 1}          | 2M       |

‘C(N1-N2-...)’ represents convolutional layers with N1, N2, ... filters for each layer.

‘D(N)’ represents a dense layer with N units.

Lifetime is defined as the total number of steps.

## B.2 Meta-Testing

We selected the best update rule ( $\eta$ ) and hyperparameters according to the validation performance on two Atari games (breakout, boxing), and used them to evaluate across all 57 Atari games. We found that subtracting a baseline slightly improves the performance on Atari games as follows:

$$\Delta\theta \propto \mathbb{E}_{\pi_\theta} \left[ \nabla_\theta \log \pi_\theta(a|s)(\hat{\pi} - f_\theta(s)) - \alpha_y \nabla_\theta D_{\text{KL}}(y_\theta(s) \|\hat{y}) - \frac{1}{2} \|f_\theta(s) - \hat{\pi}\|^2 \right], \quad (2)$$

where  $f_\theta(s)$  is an action-independent baseline function. The hyperparameters are summarised in Table 3, and the learning curves are shown in Figure 1.

## B.3 Computing Infrastructure

Our implementation is based on JAX [1], RLAX [2], Optax [4], Haiku [3] using TPUs [5]. The training environments are also implemented in JAX, which enables running on TPU as well. It took approximately 24 hours to converge using a 16-core TPU-v2.

Table 3: Hyperparameters used for meta-testing on Atari games.

| Hyperparameter                               | Value                    | Searched values         |
|----------------------------------------------|--------------------------|-------------------------|
| Optimiser                                    | Adam                     | -                       |
| Network architecture                         | C(32)-C(64)-C(64)-D(512) | -                       |
| Learning rate ( $\alpha_{lr}$ )              | 0.0005                   | {0.001, 0.0005, 0.0003} |
| KL cost ( $\alpha_y$ )                       | 0.5                      | {1, 0.5, 0.1}           |
| Discount factor ( $\gamma$ )                 | 0.995                    | -                       |
| Number of steps for each trajectory          | 20                       | -                       |
| Number of parallel environments (batch size) | 30                       | -                       |

## C Generalisation to Atari Games

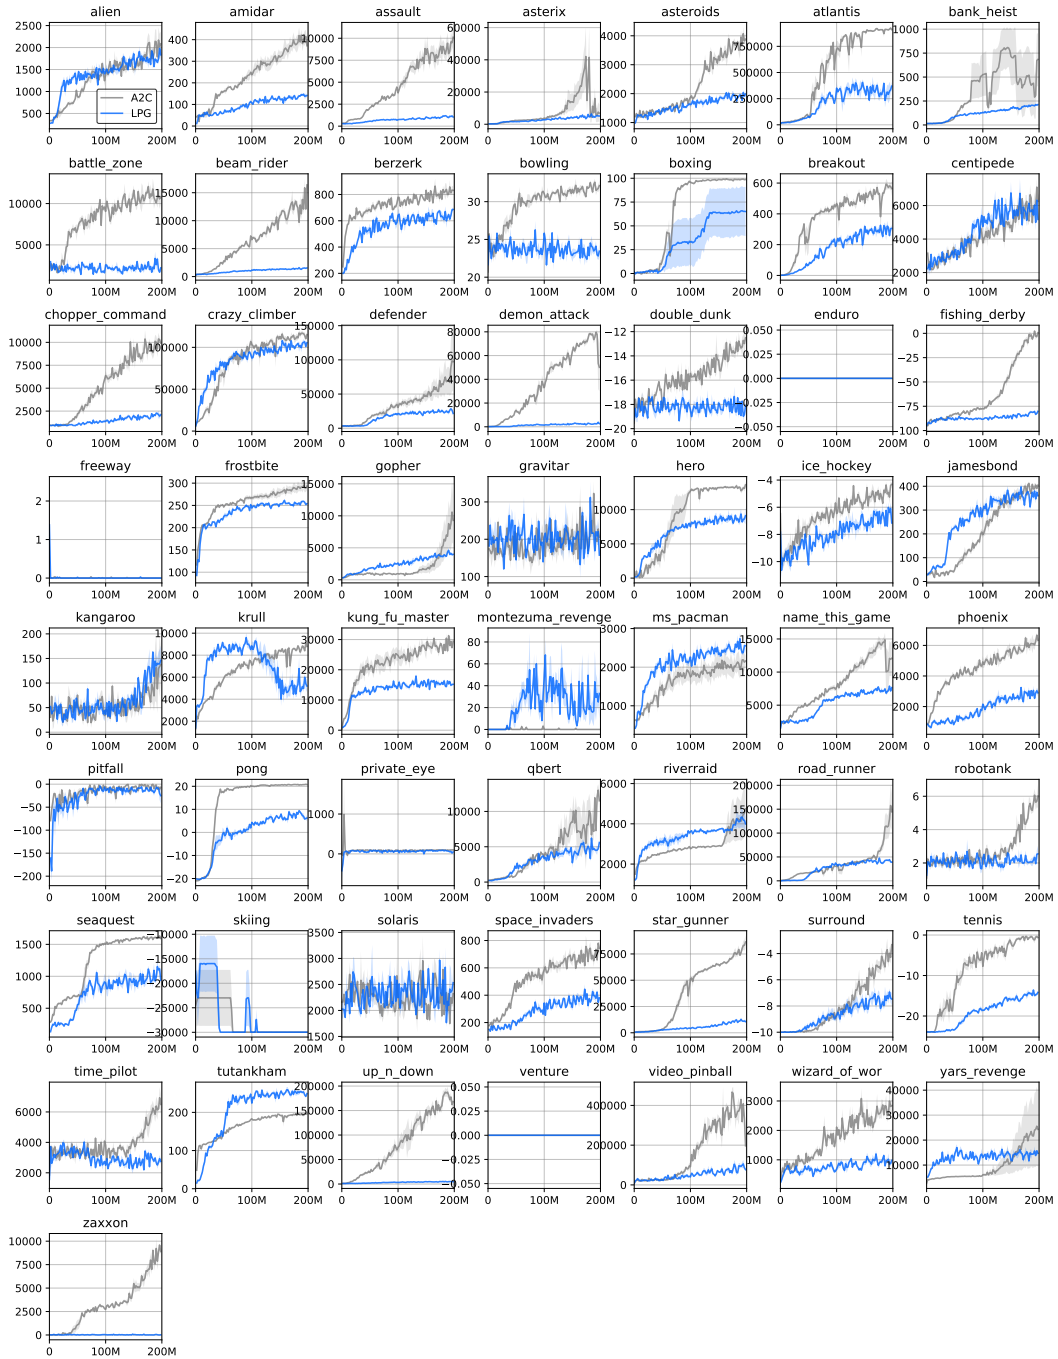

Figure 1: Learning curves on Atari games. X-axis and y-axis represent the number of frames and episode return respectively. Shaded areas show standard errors from 3 independent runs.



## References

- [1] J. Bradbury, R. Frostig, P. Hawkins, M. J. Johnson, C. Leary, D. Maclaurin, and S. Wanderman-Milne. JAX: composable transformations of Python+NumPy programs, 2018.
- [2] D. Budden, M. Hessel, J. Quan, S. Kapturowski, K. Baumli, S. Bhupatiraju, A. Guy, and M. King. RLax: Reinforcement Learning in JAX, 2020.
- [3] T. Hennigan, T. Cai, T. Norman, and I. Babuschkin. Haiku: Sonnet for JAX, 2020.
- [4] M. Hessel, D. Budden, F. Viola, M. Rosca, E. Sezener, and T. Hennigan. Optax: composable gradient transformation and optimisation, in *jax!*, 2020.
- [5] N. P. Jouppi, C. Young, N. Patil, D. A. Patterson, G. Agrawal, R. Bajwa, S. Bates, S. Bhatia, N. Boden, A. Borchers, R. Boyle, P. Cantin, C. Chao, C. Clark, J. Coriell, M. Daley, M. Dau, J. Dean, B. Gelb, T. V. Ghaemmaghami, R. Gottipati, W. Gulland, R. Hagmann, R. C. Ho, D. Hogberg, J. Hu, R. Hundt, D. Hurt, J. Ibarz, A. Jaffey, A. Jaworski, A. Kaplan, H. Khaitan, A. Koch, N. Kumar, S. Lacy, J. Laudon, J. Law, D. Le, C. Leary, Z. Liu, K. Lucke, A. Lundin, G. MacKean, A. Maggiore, M. Mahony, K. Miller, R. Nagarajan, R. Narayanaswami, R. Ni, K. Nix, T. Norrie, M. Omernick, N. Penukonda, A. Phelps, J. Ross, A. Salek, E. Samadiani, C. Severn, G. Sizikov, M. Snellman, J. Souter, D. Steinberg, A. Swing, M. Tan, G. Thorson, B. Tian, H. Toma, E. Tuttle, V. Vasudevan, R. Walter, W. Wang, E. Wilcox, and D. H. Yoon. In-datacenter performance analysis of a tensor processing unit. *CoRR*, abs/1704.04760, 2017.
- [6] V. Mnih, A. P. Badia, M. Mirza, A. Graves, T. Lillicrap, T. Harley, D. Silver, and K. Kavukcuoglu. Asynchronous methods for deep reinforcement learning. In *International Conference on Machine Learning*, 2016.
- [7] I. Osband, Y. Doron, M. Hessel, J. Aslanides, E. Sezener, A. Saraiva, K. McKinney, T. Lattimore, C. Szepesvari, S. Singh, et al. Behaviour suite for reinforcement learning. In *International Conference on Learning Representations*, 2020.
